# Supplementary material for: Highly luminescent mixed-ligand bimetallic lanthanoid(iii) complexes for photovoltaic applications
Source: Royal Society of Chemistry journal article supplement (doi:10.1039/d1dt04248c), 2022-01-01
Supplement: d1dt04248c1.pdf [file d1dt04248c1.pdf]

Supporting Information for

## Highly luminescent mixed-ligand bimetallic lanthanoid(III) complexes for photovoltaic applications†

Gabriela Brito-Santos,<sup>a</sup> Cecilio Hernández-Rodríguez,<sup>bc</sup> Beatriz Gil-Hernández,<sup>ac</sup> Benjamín González-Díaz,<sup>d</sup> Inocencio R. Martín,<sup>bc</sup> Ricardo Guerrero-Lemus,<sup>bc</sup> and Joaquín Sanchiz,<sup>\*ac</sup>

<sup>a</sup>Departamento de Química, Facultad de Ciencias, Universidad de La Laguna, Tenerife, 38206, Spain. jsanchiz@ull.edu.es

<sup>b</sup>Departamento de Física, Facultad de Ciencias, Universidad de La Laguna, Tenerife, 38206, Spain.

<sup>c</sup>Instituto Universitario de Materiales y Nanotecnología, Universidad de La Laguna, Tenerife, 38206, Spain.

<sup>d</sup>Departamento de Ingeniería Industrial, Escuela Superior de Ingeniería y Tecnología, Universidad de La Laguna, Tenerife, 38206, Spain.

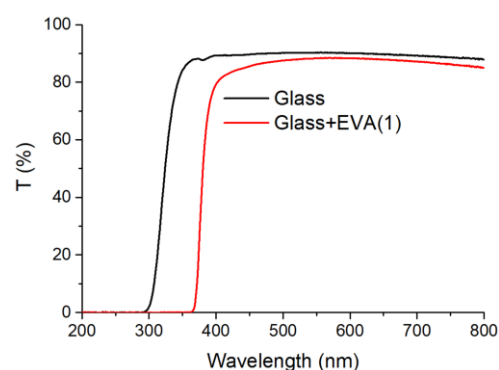

Fig. S1. Transmittance of the glass and glass covered with the down-shifting layer

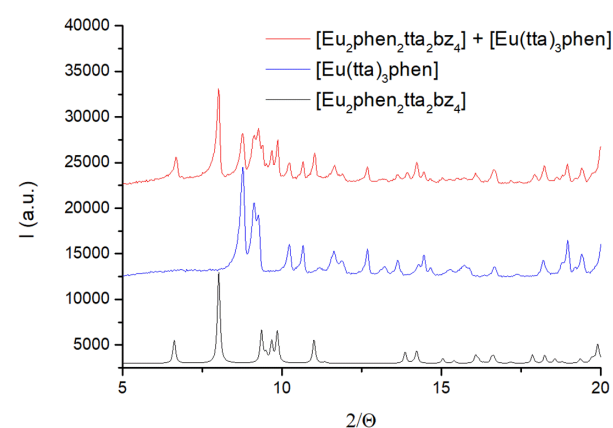

Fig. S2. Powder diffractogram of the crude product of the synthesis of **1** compared with that of [Eu<sub>2</sub>(bz)<sub>4</sub>(tta)<sub>2</sub>(phen)<sub>2</sub>] and [Eu(tta)<sub>3</sub>(phen)]

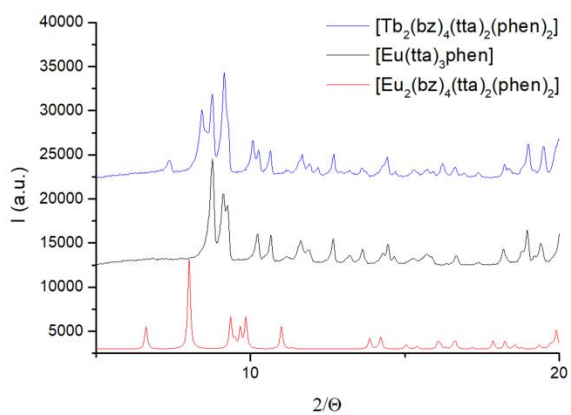

**Fig. S3.** Powder diffractogram of the crude product of the synthesis of the Tb<sub>2</sub> compound compared with that of [Eu<sub>2</sub>(bz)<sub>4</sub>(tta)<sub>2</sub>(phen)<sub>2</sub>] and [Eu(tta)<sub>3</sub>(phen)].

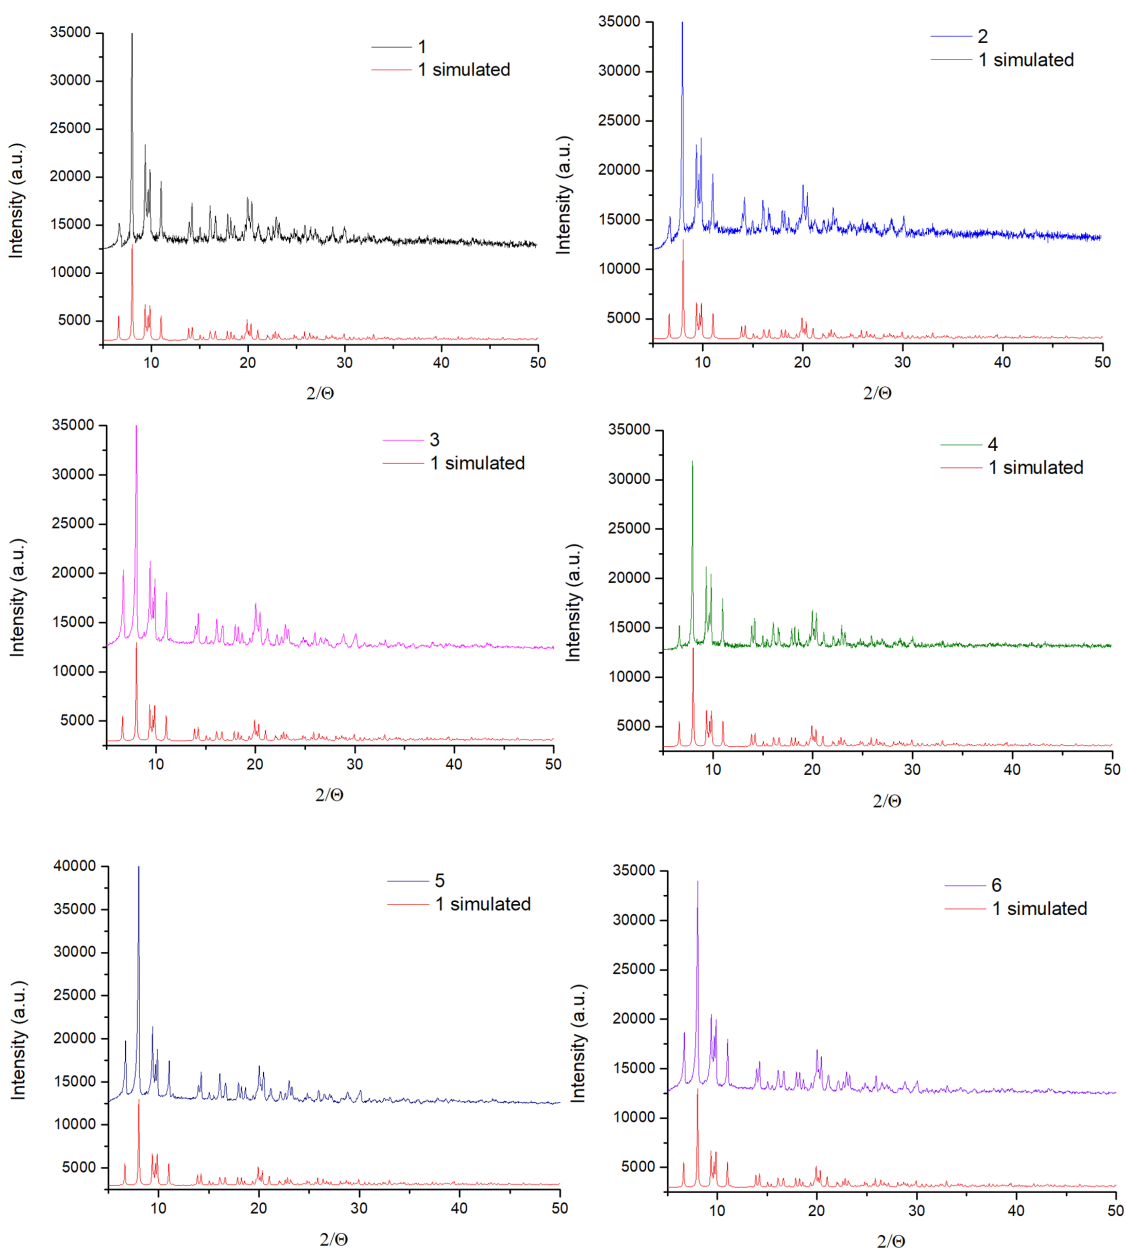

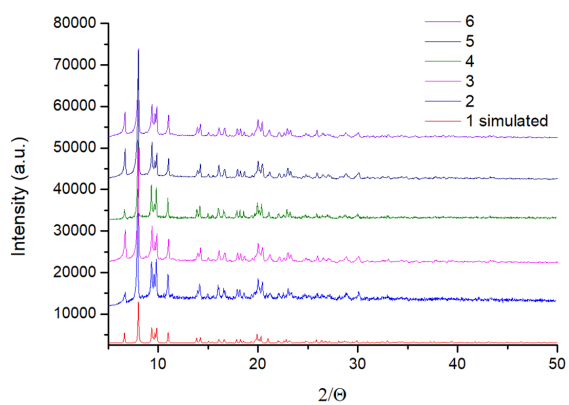

**Fig. S4.** Experimental powder diffractograms of **1-6** compared with the simulation of **1**.

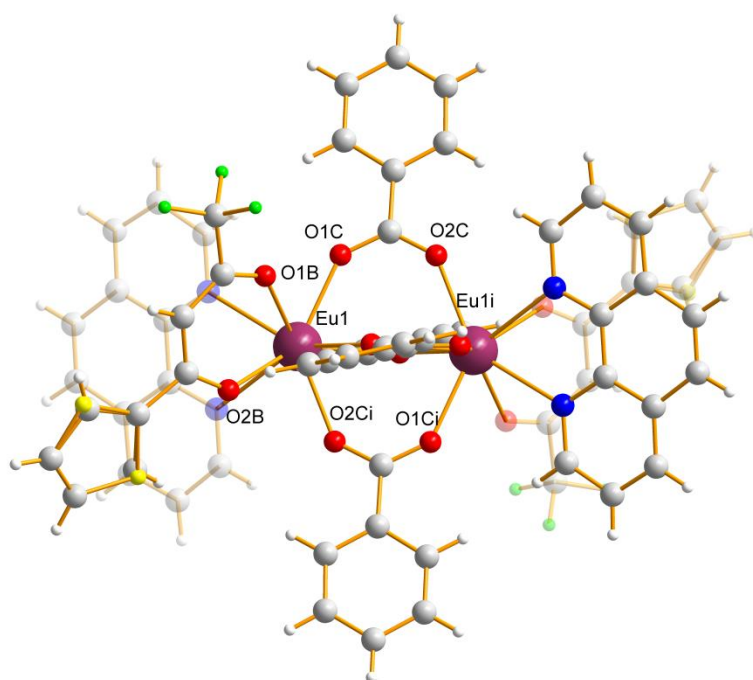

**Fig. S5.** Structure of **1** with backside atoms attenuated. (i)  $-x, -y+1, -z+1$ .

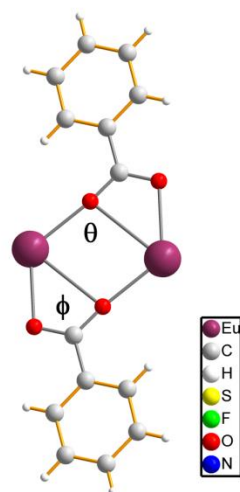

**Fig. S6.** The Eu-O-Eu and the Eu-O-C angles in the  $\mu\text{-O:k}^2\text{O,O}'$  bridges are designed as  $\theta$  and  $\varphi$  parameters.

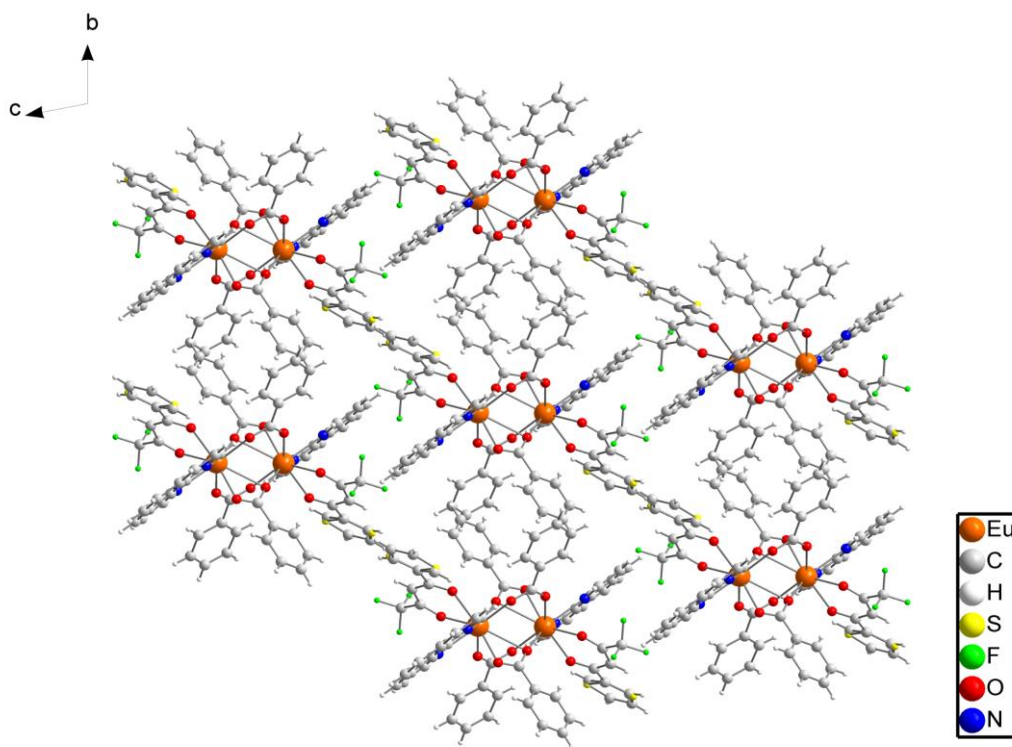

(a)

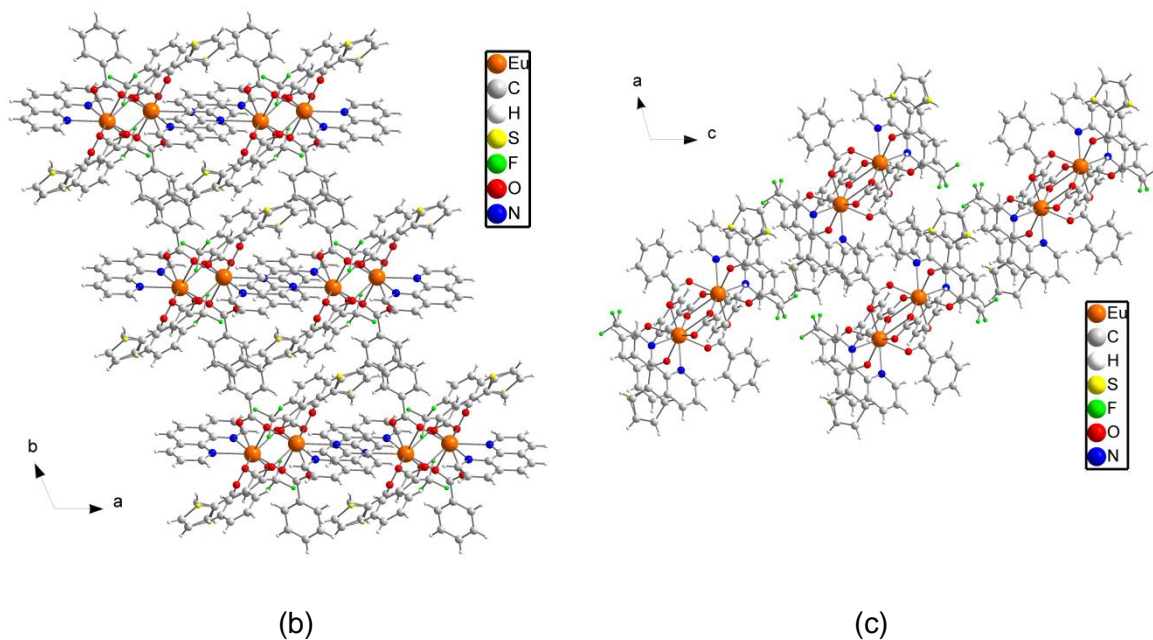

**Fig. S7.** Packing diagrams of **1**: (a) bc plane, (b) ab plane, (c) ac plane.

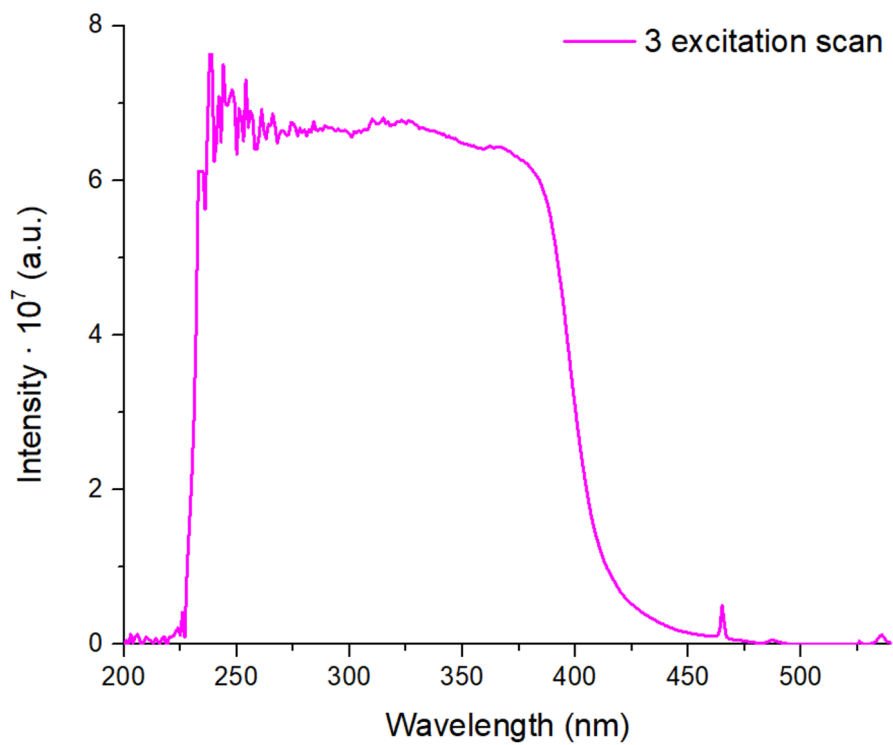

**Fig. S8.** Excitation spectrum of compound **3**

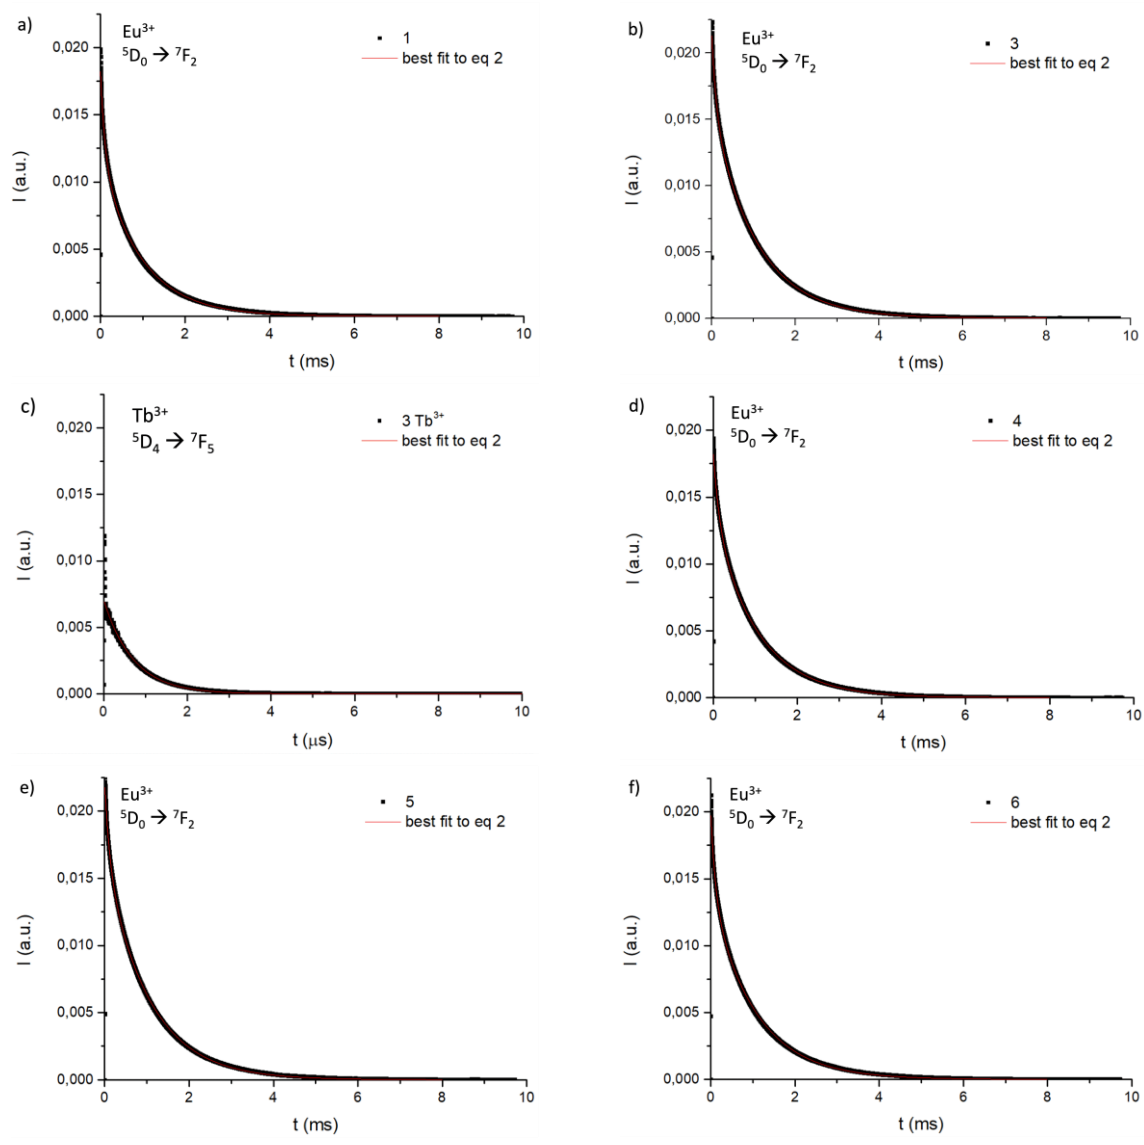

**Fig. S9.** Decay curves and best fits to equation 2 for all the compounds.

**Table S1.** Total quantities of Ln(III) nitrates in mmol for the synthesis of **1-6** compounds.

|                                                      | Compound                                                                    |                                                                             |                                                                 |
|------------------------------------------------------|-----------------------------------------------------------------------------|-----------------------------------------------------------------------------|-----------------------------------------------------------------|
|                                                      | <b>1</b>                                                                    | <b>2</b>                                                                    | <b>3</b>                                                        |
| Eu(NO <sub>3</sub> ) <sub>3</sub> ·5H <sub>2</sub> O | 0.250                                                                       | 0                                                                           | 0.125                                                           |
| Gd(NO <sub>3</sub> ) <sub>3</sub> ·6H <sub>2</sub> O | 0                                                                           | 0.250                                                                       | 0                                                               |
| Tb(NO <sub>3</sub> ) <sub>3</sub> ·5H <sub>2</sub> O | 0                                                                           | 0                                                                           | 0.125                                                           |
| <b>Total Ln(III)</b>                                 | 0.250                                                                       | 0.250                                                                       | 0.250                                                           |
| f <sub>Eu</sub>                                      | 1                                                                           | 0                                                                           | 0.5                                                             |
| f <sub>Gd</sub>                                      | 0                                                                           | 1                                                                           | 0                                                               |
| f <sub>Tb</sub>                                      | 0                                                                           | 0                                                                           | 0.5                                                             |
| Formula                                              | [Eu <sub>2</sub> (bz) <sub>4</sub> (tta) <sub>2</sub> (phen) <sub>2</sub> ] | [Gd <sub>2</sub> (bz) <sub>4</sub> (tta) <sub>2</sub> (phen) <sub>2</sub> ] | [EuTb(bz) <sub>4</sub> (tta) <sub>2</sub> (phen) <sub>2</sub> ] |
| Composition                                          | [Eu <sub>2</sub> (bz) <sub>4</sub> (tta) <sub>2</sub> (phen) <sub>2</sub> ] | [Gd <sub>2</sub> (bz) <sub>4</sub> (tta) <sub>2</sub> (phen) <sub>2</sub> ] | [EuTb(bz) <sub>4</sub> (tta) <sub>2</sub> (phen) <sub>2</sub> ] |

|                                                      | Compound                                                        |                                                                                                                                                        |                                                                                                                                                        |
|------------------------------------------------------|-----------------------------------------------------------------|--------------------------------------------------------------------------------------------------------------------------------------------------------|--------------------------------------------------------------------------------------------------------------------------------------------------------|
|                                                      | <b>4</b>                                                        | <b>5</b>                                                                                                                                               | <b>6</b>                                                                                                                                               |
| Eu(NO <sub>3</sub> ) <sub>3</sub> ·5H <sub>2</sub> O | 0.125                                                           | 0.150                                                                                                                                                  | 0.200                                                                                                                                                  |
| Gd(NO <sub>3</sub> ) <sub>3</sub> ·6H <sub>2</sub> O | 0.125                                                           | 0.100                                                                                                                                                  | 0.050                                                                                                                                                  |
| Tb(NO <sub>3</sub> ) <sub>3</sub> ·5H <sub>2</sub> O | 0                                                               | 0                                                                                                                                                      | 0                                                                                                                                                      |
| <b>Total Ln(III)</b>                                 | 0.250                                                           | 0.250                                                                                                                                                  | 0.250                                                                                                                                                  |
| f <sub>Eu</sub>                                      | 0.5                                                             | 0.6                                                                                                                                                    | 0.8                                                                                                                                                    |
| f <sub>Gd</sub>                                      | 0.5                                                             | 0.4                                                                                                                                                    | 0.2                                                                                                                                                    |
| f <sub>Tb</sub>                                      | 0                                                               | 0                                                                                                                                                      | 0                                                                                                                                                      |
| Formula                                              | [EuGd(bz) <sub>4</sub> (tta) <sub>2</sub> (phen) <sub>2</sub> ] | [Eu <sub>1,2</sub> Gd <sub>0,8</sub> (bz) <sub>4</sub> (tta) <sub>2</sub> (phen) <sub>2</sub> ]                                                        | [Eu <sub>1,6</sub> Gd <sub>0,4</sub> (bz) <sub>4</sub> (tta) <sub>2</sub> (phen) <sub>2</sub> ]                                                        |
| Composition                                          | [EuGd(bz) <sub>4</sub> (tta) <sub>2</sub> (phen) <sub>2</sub> ] | 0.6 [Eu <sub>2</sub> (bz) <sub>4</sub> (tta) <sub>2</sub> (phen) <sub>2</sub> ]<br>0.4 [EuGd(bz) <sub>4</sub> (tta) <sub>2</sub> (phen) <sub>2</sub> ] | 0.8 [Eu <sub>2</sub> (bz) <sub>4</sub> (tta) <sub>2</sub> (phen) <sub>2</sub> ]<br>0.2 [EuGd(bz) <sub>4</sub> (tta) <sub>2</sub> (phen) <sub>2</sub> ] |

f<sub>Eu</sub>; f<sub>Gd</sub>; f<sub>Tb</sub>, molar fractions of the metal ions in compounds **1-6**.

**Table S2.** Selected bond distances and angles for **1** (Å, °)

| Distances (Å)                          |             |                                        |             |
|----------------------------------------|-------------|----------------------------------------|-------------|
| Eu1—O1D                                | 2.341 (3)   | Eu1—O1B                                | 2.453 (3)   |
| Eu1—O2C <sup>i</sup>                   | 2.353 (3)   | Eu1—N1A                                | 2.605 (4)   |
| Eu1—O1C                                | 2.378 (3)   | Eu1—N2A                                | 2.657 (4)   |
| Eu1—O2B                                | 2.403 (3)   | Eu1—O1D <sup>i</sup>                   | 2.860 (4)   |
| Eu1—O2D <sup>i</sup>                   | 2.423 (3)   | Eu1···Eu1 <sup>i</sup>                 | 4.0518(3)   |
| Angles (°)                             |             |                                        |             |
| O1D—Eu1—O2C <sup>i</sup>               | 73.61 (12)  | O2B—Eu1—N2A                            | 65.94 (12)  |
| O1D—Eu1—O1C                            | 79.53 (13)  | O2D <sup>i</sup> —Eu1—N2A              | 66.96 (12)  |
| O2C <sup>i</sup> —Eu1—O1C              | 133.20 (11) | O1B—Eu1—N2A                            | 117.24 (12) |
| O1D—Eu1—O2B                            | 93.72 (13)  | N1A—Eu1—N2A                            | 62.29 (13)  |
| O2C <sup>i</sup> —Eu1—O2B              | 79.49 (13)  | O1D—Eu1—O1D <sup>i</sup>               | 78.10 (12)  |
| O1C—Eu1—O2B                            | 140.59 (12) | O2C <sup>i</sup> —Eu1—O1D <sup>i</sup> | 71.77 (11)  |
| O1D—Eu1—O2D <sup>i</sup>               | 125.98 (13) | O1C—Eu1—O1D <sup>i</sup>               | 65.58 (11)  |
| O2C <sup>i</sup> —Eu1—O2D <sup>i</sup> | 87.87 (14)  | O2B—Eu1—O1D <sup>i</sup>               | 151.26 (12) |
| O1C—Eu1—O2D <sup>i</sup>               | 77.78 (13)  | O2D <sup>i</sup> —Eu1—O1D <sup>i</sup> | 47.88 (11)  |
| O2B—Eu1—O2D <sup>i</sup>               | 132.83 (12) | O1B—Eu1—O1D <sup>i</sup>               | 132.34 (11) |
| O1D—Eu1—O1B                            | 74.93 (12)  | N1A—Eu1—O1D <sup>i</sup>               | 117.56 (11) |
| O2C <sup>i</sup> —Eu1—O1B              | 133.58 (13) | N2A—Eu1—O1D <sup>i</sup>               | 106.83 (11) |
| O1C—Eu1—O1B                            | 71.34 (12)  | O1D—Eu1—C1D <sup>i</sup>               | 102.59 (13) |
| O2B—Eu1—O1B                            | 69.42 (12)  | O2C <sup>i</sup> —Eu1—C1D <sup>i</sup> | 80.20 (13)  |
| O2D <sup>i</sup> —Eu1—O1B              | 138.50 (14) | O1C—Eu1—C1D <sup>i</sup>               | 69.08 (12)  |
| O1D—Eu1—N1A                            | 145.18 (13) | O2B—Eu1—C1D <sup>i</sup>               | 149.10 (12) |
| O2C <sup>i</sup> —Eu1—N1A              | 139.32 (12) | O2D <sup>i</sup> —Eu1—C1D <sup>i</sup> | 23.39 (13)  |
| O1C—Eu1—N1A                            | 79.89 (12)  | O1B—Eu1—C1D <sup>i</sup>               | 140.07 (12) |
| O2B—Eu1—N1A                            | 84.76 (13)  | N1A—Eu1—C1D <sup>i</sup>               | 95.84 (13)  |
| O2D <sup>i</sup> —Eu1—N1A              | 75.90 (13)  | N2A—Eu1—C1D <sup>i</sup>               | 86.93 (12)  |
| O1B—Eu1—N1A                            | 72.01 (12)  | O1D <sup>i</sup> —Eu1—C1D <sup>i</sup> | 24.53 (12)  |
| O1D—Eu1—N2A                            | 146.93 (13) | Eu1—O1D—Eu1 <sup>i</sup>               | 101.90 (12) |
| O2C <sup>i</sup> —Eu1—N2A              | 77.05 (12)  |                                        |             |
| O1C—Eu1—N2A                            | 132.85 (13) |                                        |             |

Symmetry code: (i) -x, -y+1, -z+1.
